# Supplementary material for: Dental caries risk assessment using caries management by risk assessment (CAMBRA) tool in Yanbu city, Saudi Arabia—a cross sectional study
Source: PeerJ journal article supplement (doi:10.7717/peerj.20540), 2026-01-12
Supplement: Raw_Data_sup2.xlsx [file Raw_Data_sup2.xlsx]

## Sheet: Sheet1
serial	age	gender	nationality	residence	matiralstatus	educationlevel	salary	smokingHX	comorbidityyesno	salivaflowrateigmin	frequencydentvisit	dentalanxiety	insurance	fluridatedwater	ftoothpaste1xdaily	ftoothpaste2xdaily	ppmF5000	Fvarnish	NAFmouthrinse	CHXmouthrinse	normalsalivafunction	frequentsnaking	hyposalivatorymeds	druguse	heavyplaque	reducflowratesaliva	deeppitsfissures	exposedroots	orthappliance	whitespotlesion	noncavitatedlesion	existingresto	CAMBRAcat	CAMBRA3	Newcavityorlesion
1	17.0979	male	saudi	urban	married	secondary school	7400	yes	yes	1.4	more than 6 months	no	no	yes	no	no	no	no	no	no	yes	no	no	no	yes	no	yes	no	no	yes	yes	yes	high risk	4	yes
2	19.9151	male	saudi	rural	single	bachelor degree	990	no	no	2.4	within last 6 months	no	no	yes	yes	no	no	no	no	no	yes	no	no	no	no	no	no	no	no	yes	yes	yes	moderate risk	0	yes
3	35.4333	female	saudi	urban	married	secondary school	0	no	no	1.8	more than 6 months	yes	no	yes	yes	yes	no	no	no	no	yes	no	no	no	yes	no	no	yes	no	yes	yes	yes	moderate risk	2	yes
4	31.4497	female	saudi	urban	married	secondary school	1500	no	yes	2.2	more than 6 months	yes	yes	yes	yes	yes	no	no	no	no	yes	yes	yes	no	yes	no	yes	yes	no	yes	yes	no	high risk	4	yes
5	36.3997	female	saudi	urban	married	primary school	0	no	no	1	within last 6 months	no	no	yes	yes	yes	no	no	no	yes	yes	no	no	no	yes	no	no	no	no	no	no	no	moderate risk	-3	yes
6	53.024	male	non saudi	urban	married	bachelor degree	7000	yes	no	2.4	more than 6 months	no	yes	yes	yes	no	no	no	no	no	yes	no	no	no	yes	no	yes	yes	no	no	no	no	moderate risk	1	yes
7	21.3826	female	saudi	urban	single	secondary school	990	no	no	1.8	more than 6 months	no	no	yes	yes	yes	no	no	no	no	yes	no	no	no	no	no	yes	no	no	yes	yes	yes	moderate risk	1	yes
8	37.6099	male	saudi	urban	single	bachelor degree	11300	yes	no	3.4	more than 6 months	no	no	yes	yes	no	no	no	no	no	yes	yes	no	no	no	no	yes	yes	no	yes	yes	yes	high risk	4	yes
9	26.6858	female	saudi	urban	single	bachelor degree	0	no	no	1.6	within last 6 months	no	no	yes	yes	yes	no	no	no	no	yes	yes	no	no	no	no	no	no	yes	yes	yes	yes	moderate risk	2	yes
10	42.4367	male	saudi	urban	married	secondary school	11000	no	yes	3	more than 6 months	no	no	yes	yes	yes	no	no	yes	no	yes	no	no	no	no	no	no	yes	no	no	no	no	moderate risk	-3	no
11	33.4428	female	saudi	urban	single	secondary school	0	no	no	1.6	more than 6 months	no	no	yes	yes	yes	no	no	no	no	yes	no	no	no	no	yes	no	yes	no	yes	yes	no	moderate risk	1	yes
12	56.0712	male	saudi	urban	married	bachelor degree	7000	no	no	2.4	more than 6 months	no	no	yes	yes	no	no	no	no	no	yes	no	no	no	yes	no	no	no	yes	yes	yes	yes	high risk	3	yes
13	31.6988	female	saudi	urban	married	bachelor degree	1000	no	no	2.4	more than 6 months	no	no	yes	yes	yes	no	no	no	no	yes	no	no	no	no	no	yes	yes	no	no	yes	yes	moderate risk	1	yes
14	21.2156	female	saudi	urban	single	bachelor degree	990	no	no	2.6	more than 6 months	yes	no	yes	yes	no	no	no	no	no	yes	yes	no	no	no	no	yes	no	no	yes	no	yes	moderate risk	2	yes
15	26.0726	male	saudi	urban	single	bachelor degree	0	yes	no	1.6	more than 6 months	yes	no	yes	yes	yes	no	no	no	no	yes	yes	no	no	no	no	yes	no	no	yes	yes	yes	moderate risk	2	yes
16	45.8042	male	non saudi	urban	married	primary school	1300	no	yes	2.6	never visited	no	no	yes	yes	yes	no	no	no	no	yes	no	no	no	yes	no	no	yes	no	no	no	no	moderate risk	-1	yes
17	36.0274	male	saudi	urban	married	bachelor degree	7000	no	no	2.4	more than 6 months	no	yes	yes	yes	no	no	no	no	no	yes	no	no	no	yes	no	no	yes	no	no	no	no	moderate risk	0	yes
18	35.6277	male	saudi	urban	married	secondary school	3000	yes	no	2.6	more than 6 months	yes	no	yes	yes	no	no	no	no	no	yes	no	no	no	no	no	yes	yes	no	no	no	no	moderate risk	0	yes
19	36.6352	female	saudi	urban	married	bachelor degree	16000	no	no	2	within last 6 months	no	yes	yes	yes	yes	no	no	no	no	yes	no	no	no	no	no	no	no	no	yes	yes	yes	moderate risk	0	yes
20	36.0137	female	saudi	urban	married	secondary school	0	no	no	3.2	more than 6 months	yes	no	yes	yes	yes	no	no	no	no	yes	no	no	no	yes	no	yes	yes	no	yes	yes	yes	high risk	3	yes
21	40.3532	female	saudi	urban	divorce	bachelor degree	0	no	no	2	more than 6 months	yes	no	yes	yes	no	no	no	no	no	yes	no	yes	no	yes	no	no	yes	no	yes	no	yes	high risk	3	yes
22	40.1697	male	saudi	urban	married	primary school	5300	no	no	1.4	more than 6 months	no	no	yes	yes	no	no	no	no	no	yes	yes	no	no	yes	no	no	yes	no	no	yes	yes	high risk	3	yes
23	43.0609	male	saudi	urban		secondary school	4546	yes	yes	1	more than 6 months	no	no	yes	no	no	no	no	no	no	yes	yes	yes	no	yes	no	no	yes	no	yes	no	no	high risk	4	yes
24	14.8145	male	saudi	urban	single	secondary school	5000	yes	no	3	within last 6 months	no	yes	yes	yes	no	no	no	no	no	yes	no	no	no	yes	no	no	no	yes	yes	yes	yes	high risk	3	yes
25	33.5524	female	non saudi	urban	married	bachelor degree	0	no	no	2.6	more than 6 months	yes	yes	yes	yes	yes	no	no	no	no	yes	no	no	no	no	yes	no	no	no	no	no	yes	moderate risk	-1	yes
26	26.809	female	saudi	urban	married	secondary school	990	no	no	3	more than 6 months	yes	no	yes	yes	yes	no	no	no	no	yes	no	no	no	no	no	no	no	no	no	no	yes	moderate risk	-2	yes
27	41.3087	female	saudi	urban	married	bachelor degree	0	no	no	2.6	within last 6 months	no	no	yes	yes	yes	no	no	no	yes	yes	yes	no	no	yes	no	yes	no	no	yes	yes	yes	moderate risk	2	yes
28	67.7235	male	saudi	urban	married	primary school	7000	no	no	2.2	within last 6 months	no	no	yes	no	no	no	no	yes	no	yes	no	no	no	yes	no	no	yes	no	no	yes	yes	high risk	3	no
29	37.0376	female	saudi	urban	married	secondary school	0	no	no	2.2	within last 6 months	yes	no	yes	yes	yes	no	no	no	no	yes	no	no	no	no	no	yes	yes	no	yes	yes	yes	moderate risk	1	yes
30	24.104	male	saudi	urban	single	secondary school	4000	yes	no	2.2	within last 6 months	no	no	yes	yes	yes	no	no	no	no	yes	yes	no	no	no	no	no	no	no	no	no	yes	moderate risk	-1	yes
31	34.2259	female	saudi	urban	single	bachelor degree	833	no	no	0.6	within last 6 months	yes	no	yes	yes	yes	no	no	no	no	yes	yes	no	no	yes	no	no	no	no	yes	no	no	moderate risk	0	yes
32	40.1807	female	saudi	urban	married	secondary school	0	no	no	0.8	more than 6 months	yes	no	yes	yes	no	no	no	no	no	yes	no	no	no	no	no	no	no	no	yes	no	yes	moderate risk	1	yes
33	39.3101	female	saudi	urban	married	bachelor degree	0	no	no	1	within last 6 months	no	no	yes	yes	no	no	no	no	no	yes	no	no	no	no	no	no	no	no	no	no	yes	moderate risk	-1	yes
34	28.3614	male	saudi	urban	married	bachelor degree	25000	no	no	2.8	more than 6 months	no	yes	yes	yes	no	no	no	no	no	yes	yes	no	no	no	no	no	no	no	yes	no	no	moderate risk	0	yes
35	34.0151	female	saudi	urban	married	bachelor degree	0	no	no	2.4	more than 6 months	yes	no	yes	no	no	no	no	no	no	yes	no	no	no	no	yes	no	yes	no	yes	no	yes	moderate risk	2	yes
36	54.1574	female	saudi	urban	married	primary school	0	no	no	1.4	within last 6 months	yes	no	yes	yes	yes	no	no	yes	no	yes	no	no	no	yes	no	no	yes	no	no	no	yes	moderate risk	-1	yes
37	40.5722	female	saudi	urban	married	bachelor degree	0	no	no	2.5	more than 6 months	no	no	yes	yes	yes	no	no	no	no	yes	no	no	no	no	no	no	no	no	no	no	yes	moderate risk	-2	yes
38	29.2676	female	saudi	urban	married	secondary school	0	no	no	0.75	within last 6 months	yes	no	yes	no	no	no	no	no	no	yes	no	yes	no	no	no	no	no	no	no	no	yes	moderate risk	1	yes
39	37.9548	male	saudi	urban	married	bachelor degree	13000	no	no	2.2	within last 6 months	no	no	yes	yes	yes	no	no	no	no	yes	yes	no	no	no	no	no	no	no	no	no	yes	moderate risk	-1	yes
40	45.4237	male	saudi	urban	married	bachelor degree	13600	no	no	2.2	within last 6 months	yes	no	yes	yes	no	no	no	no	no	yes	no	no	no	yes	no	no	no	no	no	no	no	moderate risk	-1	yes
41	39.6277	male	saudi	urban	married	bachelor degree	10000	no	no	1.8	more than 6 months	no	no	yes	yes	no	no	no	no	no	yes	no	no	no	no	no	yes	yes	no	no	no	yes	moderate risk	1	yes
42	65.4401	female	saudi	urban	married	primary school	0	no	yes	1.8	more than 6 months	no	no	yes	no	no	no	no	yes	no	yes	no	yes	no	yes	no	no	yes	yes	no	no	no	moderate risk	1	yes
43	39.039	male	saudi	urban	married	bachelor degree	9000	no	yes	2.6	more than 6 months	yes	no	yes	no	no	no	no	no	no	yes	no	no	no	yes	no	no	no	no	no	no	no	moderate risk	0	yes
44	19.2608	female	saudi	urban	single	secondary school	990	no	no	1.2	within last 6 months	no	no	yes	yes	no	no	no	no	no	no	no	no	no	no	no	no	no	no	no	no	yes	moderate risk	0	yes
45	32.6598	female	saudi	urban	divorce	bachelor degree	3600	yes	no	1.86	more than 6 months	no	yes	yes	yes	no	no	no	no	no	yes	no	no	no	yes	no	no	no	no	yes	yes	yes	moderate risk	2	yes
46	19.7098	female	saudi	urban	single	bachelor degree	990	no	no	2.4	within last 6 months	no	no	yes	yes	yes	no	no	no	no	no	yes	no	no	no	no	yes	no	no	yes	no	yes	moderate risk	2	yes
47	19.0363	female	saudi	urban	single	secondary school	0	no	no	1.4	within last 6 months	yes	no	yes	yes	yes	no	no	no	no	yes	no	no	no	yes	yes	yes	no	no	yes	yes	yes	moderate risk	2	yes
48	18.6831	male	saudi	urban	single	secondary school	990	no	no	2.8	within last 6 months	no	no	yes	yes	no	no	no	no	no	yes	no	no	no	yes	no	no	no	no	yes	yes	yes	moderate risk	2	yes
49	34.0233	female	non saudi	urban	married	bachelor degree	0	no	no	3.4	more than 6 months	no	no	yes	yes	yes	no	no	no	no	yes	no	no	no	yes	no	yes	no	no	yes	yes	yes	moderate risk	1	yes
50	43.3703	male	saudi	urban	married	bachelor degree	8888	yes	yes	2.8	more than 6 months	yes	no	yes	yes	no	no	no	no	no	yes	yes	no	no	no	no	no	yes	yes	no	no	no	moderate risk	1	yes
51	39.1431	male	saudi	urban	married	bachelor degree	11000	yes	yes	0.8	more than 6 months	no	no	yes	yes	no	no	no	no	no	yes	yes	no	no	no	no	yes	yes	no	no	no	no	moderate risk	0	yes
52	55.7782	male	non saudi	urban	married	post grad	15000	no	yes	2.8	within last 6 months	no	yes	yes	no	no	no	no	no	no	yes	yes	yes	no	no	no	no	no	no	no	no	yes	moderate risk	2	yes
53	43.3484	male	saudi	urban		bachelor degree	6000	no	yes	2.4	more than 6 months	no	no	yes	no	no	no	no	no	no	yes	yes	no	no	no	no	no	no	no	no	no	yes	moderate risk	1	yes
54	32.9911	male	saudi	urban	married	secondary school	7000	no	no	2	more than 6 months	no	no	yes	yes	yes	no	no	no	no	yes	no	no	no	yes	no	no	no	yes	yes	yes	yes	moderate risk	2	yes
55	47.718	male	saudi	urban	single	secondary school	3600	yes	no	2.6	within last 6 months	no	yes	yes	no	no	no	no	no	no	yes	no	no	no	yes	no	yes	yes	no	yes	no	yes	high risk	4	yes
56	41.2156	female	saudi	urban	married	bachelor degree	0	no	no	1.4	within last 6 months	no	no	yes	yes	yes	no	no	no	no	yes	no	no	no	no	no	yes	yes	no	yes	yes	no	moderate risk	1	yes
57	24.4901	male	saudi	urban	single	bachelor degree	6000	no	no	2.4	within last 6 months	yes	no	yes	yes	yes	no	no	no	no	yes	no	no	no	no	no	no	no	no	yes	yes	yes	moderate risk	0	yes
58	56.8816	male	non saudi	urban	married	secondary school	1500	no	no	2.4	never visited	no	no	yes	yes	yes	no	no	no	no	yes	no	no	no	yes	no	no	yes	no	no	no	no	moderate risk	-1	yes
59	26.8309	female	saudi	urban	married	bachelor degree	0	no	no	1.4	within last 6 months	yes	yes	yes	yes	no	no	no	no	no	yes	yes	no	no	yes	no	no	no	yes	yes	yes	yes	high risk	4	yes
60	36.4463	female	saudi	urban	married	bachelor degree	1000	no	no	2.2	within last 6 months	yes	no	yes	no	no	no	no	no	no	yes	yes	no	no	no	no	no	no	no	yes	yes	yes	high risk	3	yes
61	36.0055	female	saudi	urban	married	secondary school	0	no	no	1.6	more than 6 months	yes	no	yes	yes	yes	no	no	no	no	yes	yes	no	no	yes	no	no	no	no	yes	yes	yes	moderate risk	2	yes
62	35.5537	female	saudi	urban	married	bachelor degree	0	no	yes	1.6	within last 6 months	no	no	yes	yes	no	no	no	no	no	yes	yes	no	no	no	no	no	no	no	yes	yes	yes	moderate risk	2	yes
63	34.2286	female	saudi	urban	married	bachelor degree	11900	no	no	2	more than 6 months	no	no	yes	no	no	no	no	no	no	yes	yes	no	no	no	no	no	no	no	no	no	yes	moderate risk	1	yes
64	21.8535	female	saudi	urban	single	secondary school	0	no	yes	1.2	within last 6 months	no	no	yes	yes	yes	no	no	no	no	yes	yes	no	no	yes	no	no	no	no	yes	yes	no	moderate risk	1	yes
65	20.7858	male	saudi	urban	single	bachelor degree	3690	no	yes	0.4	within last 6 months	no	yes	yes	yes	no	no	no	yes	no	yes	no	no	no	yes	no	no	no	no	yes	yes	yes	moderate risk	1	yes
66	38.8172	female	saudi	urban	married	secondary school	4000	no	yes	2.2	more than 6 months	yes	yes	yes	yes	yes	no	no	no	no	yes	no	no	no	no	no	no	yes	no	no	no	no	moderate risk	-2	yes
67	29.0459	male	saudi	urban	married	bachelor degree	14000	yes	no	1.6	within last 6 months	no	yes	yes	no	no	no	no	no	no	yes	yes	no	no	yes	no	no	no	no	no	no	yes	moderate risk	2	yes
68	43.4524	male	saudi	urban	married	secondary school	10038	yes	no		more than 6 months	no	no	yes	no	no	no	no	no	no	no	no	no	no	yes	no	yes	no	no	no	no	no	moderate risk	2	yes
69	22.2094	male	saudi	urban	single	bachelor degree	3600	no	no	0.6	more than 6 months	no	yes	yes	no	no	no	no	no	no	yes	no	no	no	no	no	no	no	no	no	no	yes	moderate risk	0	yes
70	21.3908	male	saudi	urban	single	bachelor degree	990	no	no	1.6	within last 6 months	yes	no	yes	no	no	no	no	no	no	yes	no	no	no	yes	no	no	no	no	yes	yes	yes	high risk	3	yes
71	17.6263	male	saudi	urban	single	bachelor degree	2000	no	no	1.6	within last 6 months	no	no	yes	no	no	no	no	no	no	yes	yes	no	no	yes	no	no	no	no	yes	yes	yes	high risk	4	yes
72	42.141	male	saudi	urban	married	bachelor degree	4000	no	yes	1	more than 6 months	yes	yes	yes	yes	no	no	no	no	no	yes	no	no	no	yes	no	yes	yes	no	no	no	no	moderate risk	1	yes
73	36.0356	female	saudi	urban	married	bachelor degree	10000	no	no	2	within last 6 months	no	no	yes	yes	yes	no	no	no	no	yes	no	no	no	no	no	no	yes	no	yes	yes	yes	moderate risk	2	yes
74	37.0021	female	saudi	urban	married	secondary school	5000	no	no	2	more than 6 months	yes	no	yes	yes	no	no	no	no	no	yes	no	no	no	yes	no	yes	yes	no	yes	yes	no	high risk	3	yes
75	62.0096	female	saudi	urban	married	secondary school	1982	no	yes	4	within last 6 months	no	no	yes	yes	yes	no	no	no	no	yes	yes	no	no	yes	no	no	yes	no	no	no	yes	moderate risk	1	yes
76	40.5202	female	saudi	urban	married	bachelor degree	7000	no	yes	1.8	within last 6 months	yes	yes	yes	no	no	no	no	no	no	yes	no	no	no	yes	no	no	yes	no	no	yes	no	moderate risk	2	yes
77	43.4251	female	saudi	urban	married	bachelor degree	7500	yes	no	2.2	within last 6 months	no	no	yes	yes	no	no	no	no	no	yes	yes	no	no	yes	no	yes	yes	no	no	no	yes	high risk	3	yes
78	37.4976	female	saudi	urban	divorce	bachelor degree	2200	no	no	1	within last 6 months	no	no	yes	no	no	no	no	no	no	yes	yes	yes	no	no	no	no	no	no	yes	yes	yes	high risk	4	yes
79	39.6112	female	saudi	urban	married	bachelor degree	0	no	no	2.4	more than 6 months	no	yes	yes	yes	yes	no	no	no	no	yes	no	no	no	yes	no	no	no	no	no	no	yes	moderate risk	-1	yes
80	29.7577	male	non saudi	urban	married	secondary school	4500	no	no	2.8	within last 6 months	no	yes	yes	yes	yes	no	no	no	no	yes	yes	no	no	no	no	no	no	no	no	no	no	moderate risk	-2	yes
81	47.9261	male	saudi	urban	married	bachelor degree	12000	no	no	2	within last 6 months	no	no	yes	no	no	no	no	no	no	yes	no	no	no	no	no	no	yes	no	no	yes	yes	moderate risk	2	yes
82	46.3107	female	saudi	urban	married	secondary school	0	no	yes	3.2	more than 6 months	no	no	yes	yes	no	no	no	no	no	yes	yes	no	no	no	no	no	no	no	no	no	no	moderate risk	-1	yes
83	41.87	male	saudi	urban	married	bachelor degree	16000	yes	no	1	more than 6 months	no	no	yes	no	no	no	no	no	no	yes	no	yes	no	no	yes	no	no	no	no	no	yes	moderate risk	1	yes
84	40.4408	male	saudi	urban	married	bachelor degree	13000	yes	yes	2.4	within last 6 months	yes	no	yes	yes	no	no	no	no	no	yes	no	yes	no	yes	no	no	no	no	yes	yes	yes	high risk	3	yes
85	39.3457	female	saudi	urban	married	secondary school	0	no	no	2.4	more than 6 months	no	no	yes	yes	yes	no	no	no	no	yes	no	no	no	yes	no	no	no	no	no	yes	yes	moderate risk	0	yes
86	32.1862	male	saudi	urban	married	bachelor degree	13000	no	no	2.6	within last 6 months	no	no	yes	yes	no	no	no	no	no	yes	no	no	no	yes	no	no	no	no	yes	no	yes	moderate risk	0	yes
87	28.3587	female	saudi	urban	single	bachelor degree	0	no	yes	1.6	within last 6 months	yes	no	yes	yes	yes	no	no	no	no	yes	no	no	no	yes	no	no	yes	no	yes	yes	yes	moderate risk	2	yes
88	44.6215	female	saudi	urban	married	bachelor degree	13000	no	no		within last 6 months	no	no	yes	yes	no	no	no	no	no	yes	no	no	no	yes	no	yes	no	no	yes	yes	yes	high risk	3	yes
89	20.3888	male	saudi	urban	single	secondary school	990	no	no	2.6	more than 6 months	no	no	yes	yes	yes	no	no	no	no	yes	yes	no	no	no	no	no	yes	no	yes	yes	yes	moderate risk	2	yes
90	66.883	female	saudi	urban	widow	primary school	2100	no	yes	2.4	within last 6 months	yes	no	yes	yes	no	no	no	no	no	yes	no	yes	no	yes	no	no	yes	no	no	no	no	moderate risk	1	yes
91	65.9138	male	saudi	urban	married	primary school	2500	no	yes	3.6	within last 6 months	no	no	yes	yes	no	no	no	no	no	yes	no	yes	no	no	yes	no	no	no	no	no	yes	moderate risk	2	yes
92	30.3573	male	saudi	urban	married	bachelor degree	20000	no	no	0.8	within last 6 months	no	no	yes	yes	no	no	no	no	no	yes	no	no	no	no	no	no	no	no	no	no	yes	moderate risk	-1	yes
93	26.6639	female	saudi	urban	single	bachelor degree	4000	no	no	1.2	within last 6 months	yes	yes	yes	yes	yes	no	no	no	no	yes	yes	no	no	yes	no	no	no	no	yes	yes	yes	moderate risk	2	no
94	37.1718	female	saudi	urban	married	bachelor degree	0	no	no	1.8	within last 6 months	no	no	yes	yes	no	no	no	no	no	yes	no	no	no	yes	no	no	no	no	yes	yes	yes	moderate risk	2	yes
95	42.9268	male	saudi	urban	married	bachelor degree	15000	no	no	1	more than 6 months	no	no	yes	yes	no	no	no	no	no	yes	no	no	no	no	no	no	no	no	no	no	no	moderate risk	-2	yes
96	41.3908	male	saudi	urban	married	bachelor degree	10000	no	no	2.2	within last 6 months	yes	no	yes	no	no	no	no	no	no	yes	no	no	no	yes	no	no	yes	no	yes	yes	yes	high risk	4	yes
97	33.8426	female	saudi	urban	married	secondary school	0	no	yes	1.8	within last 6 months	yes	no	yes	yes	no	no	no	no	no	yes	no	no	no	no	no	no	no	no	yes	yes	yes	moderate risk	1	yes
98	43.8357	male	saudi	urban	divorce	bachelor degree	15000	yes	yes	0.6	more than 6 months	no	no	yes	yes	yes	no	no	no	no	yes	no	no	no	no	no	no	no	no	yes	no	no	moderate risk	-2	yes
99	22.8172	male	saudi	urban	single	secondary school	2500	no	no	1.17	more than 6 months	no	no	yes	yes	yes	no	no	yes	no	yes	no	no	no	no	no	no	no	no	yes	yes	yes	moderate risk	-1	yes
100	60.0958	female	saudi	urban	widow	no education	1900	no	yes	2.6	within last 6 months	yes	no	yes	yes	yes	no	no	no	no	yes	no	no	no	yes	no	no	no	no	no	no	yes	moderate risk	-1	yes
101	41.8973	female	saudi	rural	married	bachelor degree	5000	no	no	1.8	more than 6 months	yes	no	yes	no	no	no	no	no	no	yes	yes	no	no	yes	no	no	yes	no	yes	yes	no	high risk	4	yes
102	35.4278	female	saudi	urban	married	no education	0	no	no	3	within last 6 months	no	no	yes	yes	yes	no	no	no	no	yes	no	no	no	yes	no	no	no	no	yes	no	yes	moderate risk	1	yes
103	29.0623	male	non saudi	urban	married	bachelor degree	7000	no	no	2.4	more than 6 months	no	yes	yes	yes	no	no	no	no	no	yes	yes	no	no	yes	no	yes	no	no	yes	yes	no	high risk	3	yes
104	38.7187	female	saudi	urban	married	bachelor degree	10000		no	1.8	within last 6 months	no	no	yes	yes	yes	no	no	no	no	yes	yes	no	no	yes	no	no	no	no	yes	yes	yes	moderate risk	2	yes
105	42.9405	male	non saudi	urban	married	secondary school	4000	yes	no	3.4	never visited	no	yes	yes	yes	no	no	no	no	no	yes	no	no	no	no	no	yes	no	no	no	no	no	moderate risk	-1	yes
106	34.9405	female	non saudi	urban	married	bachelor degree	0	no	no	1.6	more than 6 months	yes	yes	yes	yes	yes	no	no	no	no	yes	no	no	no	no	no	yes	no	no	yes	yes	yes	moderate risk	1	yes
107	32.9391	male	non saudi	urban	married	bachelor degree	5750	no	no	1	more than 6 months	no	yes	yes	yes	yes	no	no	no	no	yes	no	no	no	yes	no	no	no	no	yes	yes	no	moderate risk	0	yes
108	62.037	male	saudi	urban	married	secondary school	5400		yes	2.4	within last 6 months	no	yes	yes	yes	yes	no	no	no	no	yes	no	no	no	yes	no	no	yes	no	yes	yes	no	moderate risk	1	yes
109	43.1567	male	saudi	urban	married	bachelor degree	20000	no	yes	1.6	within last 6 months	no	yes	yes	yes	yes	no	no	no	no	yes	no	no	no	no	no	no	yes	no	no	no	yes	moderate risk	-1	yes
110	46.2998	male	saudi	urban	married	bachelor degree	12000	no	no	3	more than 6 months	no	no	yes	yes	yes	no	no	no	yes	yes	no	no	no	no	no	no	no	no	no	yes	yes	moderate risk	-2	yes
111	38.4914	male	non saudi	urban	married	bachelor degree	4500	yes	yes	3.4	never visited	no	yes	yes	yes	no	no	no	no	no	yes	yes	no	no	no	no	no	no	no	no	no	no	moderate risk	-1	yes
112	24.9446	male	non saudi	urban		secondary school	0	no	yes	2.6	more than 6 months	no	no	yes	no	no	no	no	no	no	yes	no	no	no	yes	no	no	yes	no	yes	yes	no	high risk	3	yes
113	42.5626	male	saudi	urban	married	secondary school	14000	yes	no	1.4	more than 6 months	yes	no	yes	no	no	no	no	no	no	yes	yes	no	no	yes	no	yes	yes	no	yes	no	no	high risk	3	yes
114	21.6482	male	saudi	urban	single	secondary school	990	yes	yes	2.2	more than 6 months	no	yes	yes	no	no	no	no	yes	no	yes	yes	no	no	yes	no	no	no	no	yes	yes	no	moderate risk	2	yes
115	48.2793	male	saudi	urban	married	bachelor degree	16000	no	yes	2	within last 6 months	no	no	yes	yes	yes	no	no	no	no	yes	no	no	no	yes	no	yes	yes	no	no	no	yes	moderate risk	1	yes
116	38.3847	male	non saudi	urban	married	bachelor degree	5000	no	no	2.2	more than 6 months	no	no	yes	yes	no	no	no	no	no	yes	no	no	no	no	no	no	yes	no	yes	yes	no	moderate risk	2	yes
117	59.1431	male	saudi	urban	married	secondary school	4000	no	yes	2	within last 6 months	yes	yes	yes	yes	yes	no	no	no	no	yes	yes	no	no	yes	no	yes	yes	no	yes	yes	yes	high risk	4	yes
118	47.154	female	saudi	urban	married	bachelor degree	14000	no	yes	1.8	within last 6 months	no	no	yes	yes	yes	no	no	no	no	yes	no	no	no	no	no	no	no	no	no	no	yes	moderate risk	-2	yes
119	34.1383	male	saudi	urban		secondary school	10000	no	no	3.6	more than 6 months	no	no	yes	no	no	no	no	no	no	yes	no	no	no	no	no	no	no	no	no	no	yes	moderate risk	0	yes
120	47.9452	male	saudi	urban	married	post grad	20000	no	no	1.8	within last 6 months	no	no	yes	yes	yes	no	no	no	no	yes	no	no	no	yes	no	no	no	no	no	no	yes	moderate risk	-1	yes
121	54.3874	male	saudi	urban	married	bachelor degree	20030	yes	yes	3.4	more than 6 months	no	no	yes	no	no	no	no	no	no	yes	no	no	no	yes	no	no	no	no	no	no	yes	moderate risk	1	yes
122	38.5927	male	saudi	urban	divorce	bachelor degree	10000	no	yes	1.4	more than 6 months	no	no	yes	yes	yes	no	no	no	no	yes	yes	no	no	no	no	no	no	no	no	no	yes	moderate risk	-1	yes
123	37.6126	female	saudi	urban	single	secondary school	2000	no	yes	3.6	within last 6 months	yes	no	yes	yes	no	no	no	no	no	yes	no	no	no	no	no	no	no	no	no	yes	yes	moderate risk	-1	yes
124	44.5092	male	saudi	urban	married	bachelor degree	13000	no	no	3.4	within last 6 months	no	no	yes	yes	no	no	no	no	no	yes	yes	no	no	yes	no	no	yes	no	yes	no	yes	high risk	3	yes
125	37.2539	male	saudi	urban	married	bachelor degree	10000	no	no	2.8	more than 6 months	no	no	yes	yes	no	no	no	no	no	yes	yes	no	no	yes	no	no	no	no	no	yes	yes	moderate risk	2	yes
126	52.4134	female	non saudi	urban	divorce	primary school	0	no	no	2.6	more than 6 months	yes	no	yes	yes	yes	no	no	no	no	yes	yes	no	no	no	no	no	no	no	no	no	yes	moderate risk	-1	no
127	34.9678	female	saudi	urban	married	secondary school	5000	no	yes	3.2	never visited	no	no	yes	yes	yes	no	no	no	no	yes	no	no	no	no	no	yes	no	no	no	no	no	moderate risk	-2	yes
128	61.0842	female	saudi	urban	married	primary school	0	no	yes	3.6	more than 6 months	yes	no	yes	no	no	no	no	no	no	yes	yes	yes	no	no	no	no	yes	no	no	no	no	moderate risk	2	yes
129	35.8741	male	saudi	urban	married	bachelor degree	5400	no	no	3.4	more than 6 months	no	no	yes	no	no	no	no	no	no	yes	no	no	no	yes	no	no	no	no	no	yes	yes	moderate risk	2	yes
130	50.7023	male	non saudi	urban	married	bachelor degree	2500	yes	no	1.6	more than 6 months	no	no	yes	yes	yes	no	no	no	no	yes	no	no	no	no	no	no	no	no	no	no	no	moderate risk	-3	yes
131	49.9603	male	non saudi	urban	married	post grad	12000	no	yes	2.2	more than 6 months	no	yes	yes	yes	no	no	no	no	no	yes	yes	yes	no	no	no	no	no	no	no	no	yes	moderate risk	1	yes
132	31.7098	female	non saudi	urban	married	primary school	0	no	no	3.4	more than 6 months	no	no	yes	yes	no	no	no	no	no	yes	no	no	no	no	yes	no	yes	no	no	no	no	moderate risk	0	yes
133	43.0527	male	saudi	urban	married	bachelor degree	14000	no	no	2.8	within last 6 months	no	no	yes	no	no	no	no	no	no	yes	yes	yes	no	yes	no	no	yes	no	no	no	yes	high risk	4	yes
134	17.7577	female	saudi	urban	married	bachelor degree	13000	no	yes	2.4	within last 6 months	yes	no	yes	yes	yes	no	no	no	no	yes	no	no	no	no	no	no	no	no	no	no	yes	moderate risk	-2	yes
135	18.9076	male	saudi	urban	single	bachelor degree	0	yes	no	4.2	within last 6 months	no	no	yes	no	no	no	no	no	no	yes	no	no	no	yes	no	no	no	no	yes	no	yes	high risk	3	yes
136	50.412	female	saudi	urban	married	bachelor degree	10000	no	yes	2.2	within last 6 months	yes	no	yes	yes	yes	no	no	no	no	yes	no	no	no	no	no	no	yes	no	no	no	yes	moderate risk	-1	yes
137	29.629	male	saudi	urban	single	secondary school	3700	no	yes	2.4	more than 6 months	yes	yes	yes	yes	yes	no	no	no	no	yes	yes	no	no	yes	no	yes	yes	no	yes	yes	no	high risk	3	yes
138	50.4148	male	saudi	urban	married	bachelor degree	18000	yes	yes	2.6	within last 6 months	yes	no	yes	no	no	no	no	no	no	yes	yes	no	no	yes	no	yes	yes	yes	yes	no	yes	high risk	3	yes
139	45.0924	female	saudi	urban	married	bachelor degree	6500	no	yes	2.6	more than 6 months	yes	no	yes	yes	yes	no	no	no	no	yes	yes	no	no	yes	no	yes	yes	no	yes	yes	no	moderate risk	2	yes
140	35.7837	male	saudi	urban	married	bachelor degree	7000	no	no	3	more than 6 months	no	no	yes	yes	no	no	no	no	no	yes	yes	no	no	no	no	no	no	no	no	no	no	moderate risk	-1	yes
141	43.4004	male	non saudi	urban	married	secondary school	5000	yes	no	2.8	within last 6 months	no	yes	yes	yes	yes	no	no	no	no	yes	yes	no	no	no	no	yes	yes	no	no	yes	yes	moderate risk	2	yes
