# Supplementary material for: Dental caries risk assessment using caries management by risk assessment (CAMBRA) tool in Yanbu city, Saudi Arabia—a cross sectional study
Source: PeerJ journal article supplement (doi:10.7717/peerj.20540), 2026-01-12
Supplement: Supplementary_file1.docx [file Supplementary_file1.docx]

| **Variable** | **Categorization** | **Moderate** | **High** | **P-value** |
| --- | --- | --- | --- | --- |
| Gender | Male | 55 (77.4) | 21 (27.6) | 0.06 |
| Female | 55 (84.6) | 10 (15.4) |
| Nationality | Saudi | 93 (76.2) | 29 (23.8) | 0.15 |
| Non-Saudi | 17 (89.5) | 2 (10.5) |
| Residence | Rural | 1 (50.0) | 1 (50.0) | 0.39 |
| Urban | 109 (78.4) | 30 (21.6) |
| Marital status | Single | 22 (75.9) | 7 (24.1) | 0.73 |
| Married | 80 (80.0) | 20 (20.0) |
| Divorce | 4 (66.7) | 2 (33.3) |
| Widow | 2 (100.0) | 0 (0.0) |
| Education level | No education | 2 (100.0) | 0 (0.0) | 0.78 |
| Primary education | 9 (81.8) | 2 (18.2) |
| Secondary education | 33 (75.0) | 11 (25.0) |
| Bachelor’s degree | 63 (77.8) | 18 (22.2) |
| Post graduation | 3 (100.0) | 0 (0.0) |
| Smoking status | Nonsmoker | 91 (81.3) | 21 (18.8) | 0.04* |
| Smoker | 17 (63.0) | 10 (37.0) |
| Comorbidity | Present | 73 (76.0) | 23 (24.0) | 0.27 |
| Absent | 37(82.2) | 8 (17.8) |
|  |  | Mean (S.D) | |  |
| Age |  | 38.01 (11.23) | 37.51 (12.45) |  |
| Monthly income |  | 5485.65 (6029.89) | 6001.16 (5071.96) |  |
| Salivary flow rate/minutes |  | 2.15 (0.80) | 2.23 (0.74) |  |

*p-value < 0.05
